# Supplementary material
Source: PubMed Central journal article supplement (PMC8259020)
Supplement: NIHMS1710146-supplement-1.pdf [file NIHMS1710146-supplement-1.pdf]

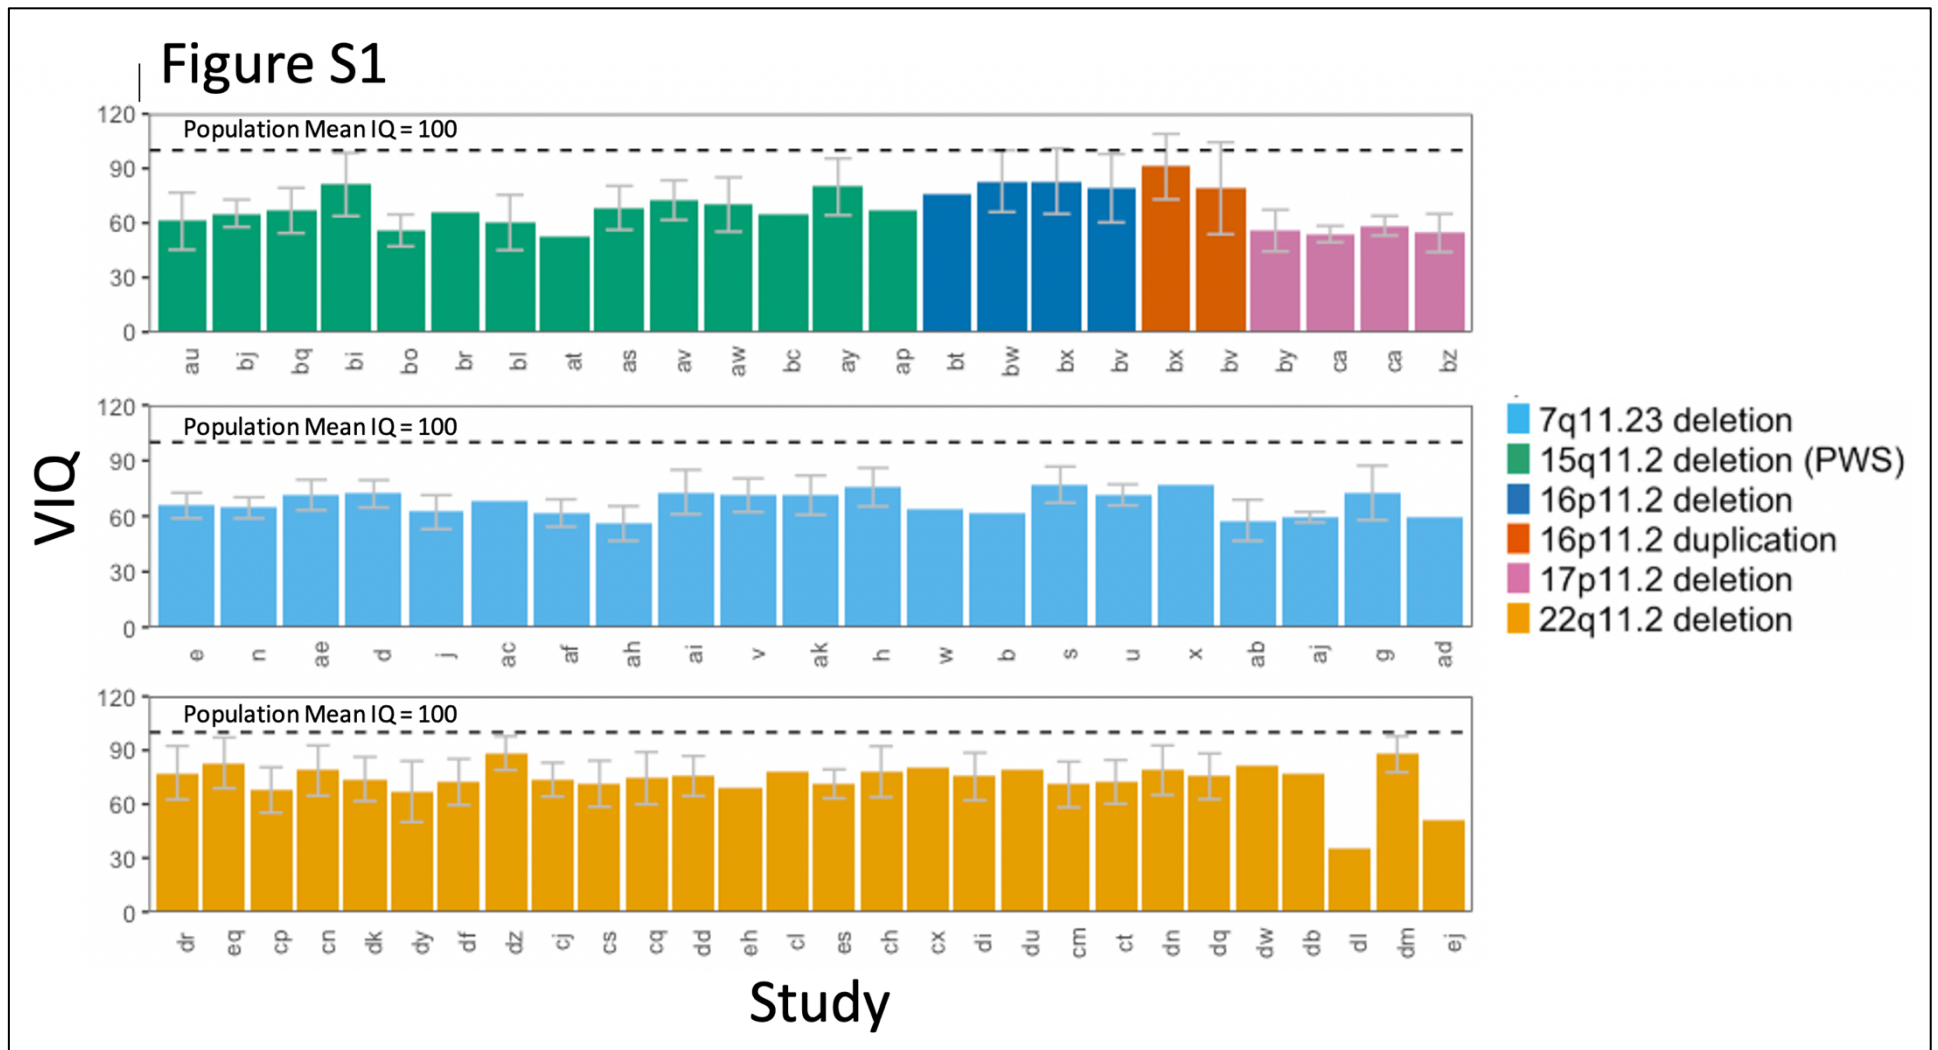

**Figure S1. VIQ measures across studies for 6 CNV.** Study indicator on x-axis corresponds to study ID indicator in Table S1. If more than one study for a CNV, studies were listed chronologically from earliest to most recent, or left to right. Dashed black line indicates population mean IQ of 100.

# Figure S2

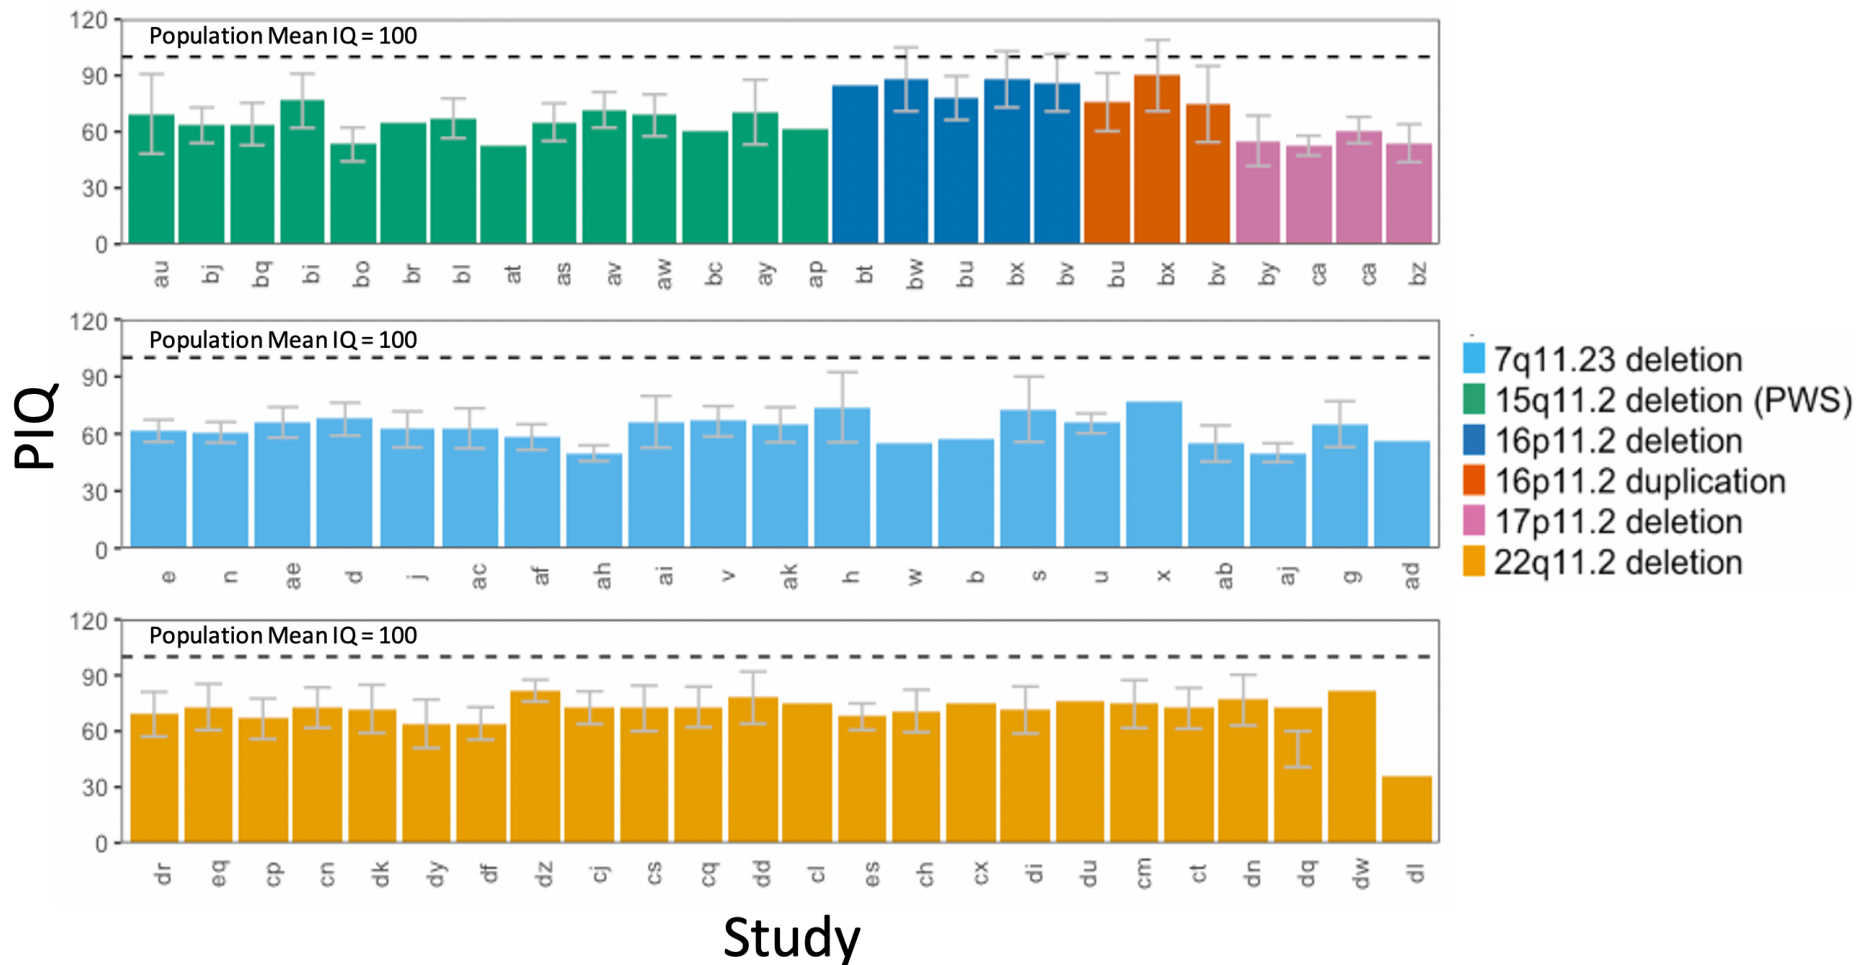

**Figure S2. PIQ measures across studies for 6 CNV.** Study indicator on x-axis corresponds to study ID indicator in Table S1. If more than one study for a CNV, studies were listed chronologically from earliest to most recent, or left to right. Dashed black line indicates population mean IQ of 100.
