# Supplementary material
Source: PubMed Central journal article supplement (PMC8259020)
Supplement: NIHMS1710146-supplement-2.pdf [file NIHMS1710146-supplement-2.pdf]

| CNV                  | Paper                     | Sample size | Instrument          | Study Indicator |
|----------------------|---------------------------|-------------|---------------------|-----------------|
| <b>3q29 deletion</b> | Russo-Sanchez et. al      | 32          | DAS, WASI           | a               |
|                      | <b>7q11.23 deletion</b>   |             |                     |                 |
|                      | Binelli et. al            | 20          | WAIS                | b               |
|                      | Brawn et. al              | 30          | Woodcock Johnson    | c               |
|                      | Chiang et. al             | 41          | WAIS                | d               |
|                      | Davies et. al             | 70          | WAIS                | e               |
|                      | Del Cole et. al           | 22          | WISC                | f               |
|                      | Dror et. al               | 80          | WISC, WAIS          | g               |
|                      | Dunning et. al            | 44          | Kaufman             | h               |
|                      | Elison et. al             | 92          | WAIS                | i               |
|                      | Farran et. al             | 20          | WASI                | j               |
|                      | Gerard-Desplanches et. al | 39          | WAIS, WISC, Kaufman | k               |
|                      | Gregory et. al            | 20          | Kaufman             | l               |
|                      | Hocking et. al            | 20          | Woodcock Johnson    | m               |
|                      | Howlin et. al             | 62          | WAIS                | n               |
|                      | Jackowski et. al          | 28          | WISC, WAIS          | o               |
|                      | Klein-Tasman et. al       | 100         | Kaufman             | p               |
|                      | Klein-Tasman et. al       | 84          | Kaufman             | q               |
|                      | Ly et. al                 | 21          | Kaufman             | r               |
|                      | McGrath et. al            | 46          | Kaufman             | s               |
|                      | Mervis et. al             | 76          | DAS                 | t               |
|                      | Ng et. al                 | 20          | WAIS                | u               |
|                      | Ng. et al                 | 62          | WAIS                | v               |
|                      | Perez-Garcia et. al       | 69          | WISC                | w               |
|                      | Pitts et. al              | 292         | Kaufman             | x               |
|                      | Plesa Skwerer et. al      | 29          | Kaufman             | y               |
|                      | Porter et. al             | 55          | Woodcock Johnson    | z               |
|                      | Pryweller et. al          | 29          | Kaufman             | aa              |
|                      | Rossi et. al              | 26          | WISC                | ab              |
|                      | Santos et. al             | 21          | WISC, WAIS          | ac              |
|                      | Sauna-Aho et. al          | 25          | WISC, WAIS          | ad              |
|                      | Searcy et. al             | 80          | WISC, WAIS          | ae              |
|                      | Stinton et. al            | 92          | WAIS                | af              |
|                      | Sullivan et. al           | 22          | Kaufman, DAS        | ag              |
|                      | Tavano et. al             | 26          | WISC                | ah              |
|                      | Van der fluit et. al      | 24          | Kaufman             | ai              |
|                      | Wuang et. al              | 38          | WISC                | aj              |
|                      | Zarchi et. al             | 24          | WISC                | ak              |

|                               |                      |            |               |    |
|-------------------------------|----------------------|------------|---------------|----|
| <b>15q11.2 deletion (AS)</b>  | Grieco et. al        | 25         | Bayley        | al |
|                               | Peters et. al        | 20         | Bayley        | am |
| <b>15q11.2 deletion (PWS)</b> | Avrahamy et. al      | 53         | WAIS, WISC    | an |
|                               | Azor et. al          | 20         | WAIS          | ao |
|                               | Baker et. al         | 25         | WISC, WAIS    | ap |
|                               | Bruining et. al      | 88         | WISC, WAIS    | aq |
|                               | Chavalere et. al     | 30         | WAIS          | ar |
|                               | Chevalere et. al     | 20         | WAIS          | as |
|                               | Copet et. al         | 99         | WAIS          | at |
|                               | Curfs et. al         | 26         | WISC          | au |
|                               | Dimitropoulos et. al | 35         | WISC, WAIS    | av |
|                               | Dimitropoulos et. al | 39         | WISC, WAIS    | aw |
|                               | Dykens et. al        | 54         | Kaufman       | ax |
|                               | Dykens et. al        | 146        | Kaufman       | ay |
|                               | Dykens et. al        | 240        | Kaufman       | az |
|                               | Hartley et. al       | 65         | WISC, WAIS    | ba |
|                               | Holland et. al       | 65         | WISC, WAIS    | bb |
|                               | Kuppens et. al       | 25         | WISC, WAIS    | bc |
|                               | Lo et. al            | 69         | WISC          | bd |
|                               | Lo et. al            | 75         | Bayley, WPPSI | be |
|                               | Lukoshe et. al       | 24         | WISC          | bf |
|                               | Ly et. al            | 20         | Kaufman       | bg |
|                               | Manning et. al       | 20         | WAIS          | bh |
|                               | Milner et. al        | 47         | WAIS          | bi |
|                               | Roof et. al          | 38         | WISC, WAIS    | bj |
|                               | Salles et. al        | 26         | WAIS          | bk |
|                               | Semenza et. al       | 23         | WAIS          | bl |
|                               | Shivers et. al       | 196        | Kaufman       | bm |
|                               | Shriki-Tal et. al    | 53         | WAIS          | bn |
|                               | Shu et. al           | 20         | WISC, WAIS    | bo |
|                               | Skokauskas et. al    | 24         | Leiter        | bp |
|                               | Whittington et. al   | 97         | WISC, WAIS    | bq |
| Zarcone et. al                | 73                   | WISC, WAIS | br            |    |
|                               | Blackmon et. al      | 30         | WASI          | bs |
|                               | Hanson et. al        | 21         | WASI, DAS     | bt |
|                               | Hippolyte et. al     | 62         | WASI          | bu |

|                                               |                       |            |            |                        |
|-----------------------------------------------|-----------------------|------------|------------|------------------------|
| <b>16p11.2 deletion<br/>(proximal)</b>        | Kim et. al            | 110        | DAS        | bv                     |
|                                               | Moreno-de-luca et. al | 56         | WASI       | bw                     |
|                                               | Owen et. al           | 75         | WASI       | bx                     |
| <b>16p11.2<br/>duplication<br/>(proximal)</b> | Blackmon et. al       | 25         | WASI       | bs                     |
|                                               | Hippolyte et. al      | 44         | WASI       | bu                     |
|                                               | Kim et. al            | 58         | DAS        | bv                     |
|                                               | Owen et. al           | 71         | WASI       | bx                     |
| <b>17p11.2<br/>deletion</b>                   | Greenberg et. al      | 27         | WAIS       | by                     |
|                                               | Madduri et. al        | 57         | WISC       | bz                     |
|                                               | Udwin et. al          | 40         | WISC, WAIS | ca                     |
| <b>22q11.2 deletion</b>                       | Albert et. al         | 63         | WISC       | cb                     |
|                                               | Angkustsiri et. al    | 100        | WISC       | cc                     |
|                                               | Antshel et. al        | 84         | WISC       | cd                     |
|                                               | Armando et. al        | 126        | WISC       | ce                     |
|                                               | Badoud et. al         | 29         | WISC, WAIS | cf                     |
|                                               | Baker et. al          | 25         | WISC, WAIS | cg                     |
|                                               | Bostelmann et. al     | 71         | WISC       | ch                     |
|                                               | Bruining et. al       | 90         | WISC, WAIS | ci                     |
|                                               | Butcher et. al        | 100        | WAIS       | cj                     |
|                                               | Campbell et. al       | 24         | WASI       | ck                     |
|                                               | Carmel et. al         | 92         | WISC, WAIS | cl                     |
|                                               | Chawner et. al        | 75         | WASI       | IQ scores not reported |
|                                               | Cunningham et. al     | 70         | WASI       | cm                     |
|                                               | De Smedt et. al       | 103        | WISC       | cn                     |
| De Sonnevile et. al                           | 58                    | WISC, WAIS | co         |                        |

## 22q11.2 deletion

|                     |     |                                |                        |
|---------------------|-----|--------------------------------|------------------------|
| Debbane et. al      | 43  | WISC, WAIS                     | cp                     |
| Dewulf et. al       | 37  | WISC, WAIS                     | cq                     |
| Dufour et. al       | 58  | WISC, WAIS                     | cr                     |
| Duijff et. al       | 69  | WISC                           | cs                     |
| Eaton et. al        | 108 | WASI                           | ct                     |
| Fabbro et. al       | 74  | WISC, WAIS                     | cu                     |
| Fiksinski et. al    | 99  | WAIS                           | cv                     |
| Francisco et. al    | 28  | WISC, WAIS                     | cw                     |
| Franconi et. al     | 159 | WPPSI, WISC, WAIS              | cx                     |
| Frascarelli et. al. | 51  | WAIS                           | cy                     |
| Glaser et. al       | 26  | WISC                           | cz                     |
| Gothelf et. al      | 79  | WISC, WAIS                     | da                     |
| Heller et. al       | 51  | WAIS                           | db                     |
| Hidding et. al      | 45  | WISC                           | dc                     |
| Hooper et. al       | 42  | WISC                           | dd                     |
| Hwang et. al        | 80  | WISC, WASI                     | de                     |
| Jacobson et. al     | 31  | WISC                           | df                     |
| Jensen et. al       | 66  | WISC                           | IQ scores not reported |
| Kates et. al        | 41  | WISC                           | dg                     |
| Kikinis et. al      | 56  | WASI                           | dh                     |
| Klaassen et. al     | 171 | WISC, WAIS                     | di                     |
| Kravariti et. al    | 29  | WISC, WIAS                     | dj                     |
| Lewandowski et. al  | 26  | WISC                           | dk                     |
| Lin et. al          | 106 | WASI, WAIS                     | dl                     |
| Linton et. al       | 57  | WASI, WISC                     | dm                     |
| McCabe et. al       | 70  | WASI, WISC                     | dn                     |
| Momma et. al        | 34  | WAIS                           | do                     |
| Monks et. al        | 83  | WASI                           | dp                     |
| Mosheva et. al      | 260 | WAIS, WISC                     | dq                     |
| Moss et. al         | 33  | WISC                           | dr                     |
| Murphy et. al       | 50  | Quick test                     | IQ scores not reported |
| Niklasson et. al    | 100 | WISC, WASI                     | ds                     |
| Olszewski et. al    | 57  | WAIS                           | dt                     |
| Ousley et. al       | 56  | WISC, WAIS                     | du                     |
| Padula et. al       | 63  | WISC, WAIS                     | dv                     |
| Pontillo et. al     | 75  | WISC, WAIS                     | dw                     |
| Radoeva et. al      | 33  | WISC, WAIS                     | dx                     |
| Raux et. al         | 92  | WISC, WAIS                     | dy                     |
| Roizen et. al       | 40  | WISC                           | dz                     |
| Schaer et. al       | 59  | WISC                           | ea                     |
| Schneider et. al    | 47  | WISC, WAIS                     | eb                     |
| Schoch et. al       | 74  | WISC                           | ec                     |
| Schreiner et. al    | 26  | WASI                           | ed                     |
| Scott et. al        | 69  | WISC, WASI, Kaufman,<br>Leiter | ee                     |
| Serur et. al        | 25  | WISC                           | ef                     |
| Shashi et. al       | 22  | WISC                           | eg                     |

|                       |     |                    |    |
|-----------------------|-----|--------------------|----|
| Sinderberry et. al    | 50  | WISC               | eh |
| Tylee et. al          | 56  | WAIS               | ei |
| Ua-areechit et. al    | 34  | Bayley, WISC, WAIS | ej |
| Uljarovic et. al      | 38  | WISC, WAIS         | ek |
| Van Aken et. al       | 28  | WISC, WPPSI        | el |
| Van Amelsvoort et. al | 26  | WAIS               | em |
| Van Den Heuvel et. al | 21  | WISC               | en |
| Vangkilde et. al      | 29  | RIST               | eo |
| Weinberger et. al     | 117 | WISC, WAIS         | ep |
| Woodin et. al         | 81  | WPPSI, WISC, WAIS  | eq |
| Yuen et. al           | 103 | WAIS               | er |
| Zarchi et. al         | 39  | WISC               | es |

**Abbreviations:**

DAS: Differential Ability Scales

RIST: Reynolds Intellectual Screening Test

WAIS: Wechsler Adult Intelligence Scale

WASI: Wechsler Abbreviated Scale of Intelligence

WISC: Wechsler Intelligence Scale for Children

WPPSI: Wechsler Preschool and Primary Scale of Intelligence

**Table S1. Sample sizes and cognitive instruments of CNV Papers.** Study indicator is matched to corresponding studies in Figures 2, S1, and S2.

| Search Term(s)                           | Total # Pubmed search results | Total # unique search results* | Exclusion Criteria                    |                        |                |                   |                         |                        | Total # of eligible papers |
|------------------------------------------|-------------------------------|--------------------------------|---------------------------------------|------------------------|----------------|-------------------|-------------------------|------------------------|----------------------------|
|                                          |                               |                                | Cognitive ability scores not reported | Inadequate sample size | Nested samples | Non-human studies | No instruments reported | Unable to access paper |                            |
| “3q29 deletion and cognitive ability”    | 3                             | 3                              | 2                                     | -                      | -              | -                 | -                       | -                      | 1                          |
| “3q29 deletion and IQ”                   | 2                             | 2                              | 1                                     | 1                      | -              | -                 | -                       | -                      | 0                          |
| “7q11.23 deletion and cognitive ability” | 19                            | 19                             | 5                                     | 9                      | 1              | 1                 | -                       | -                      | 3                          |
| “7q11.23 deletion and IQ”                | 10                            | 8                              | 2                                     | 3                      | -              | 1                 | -                       | -                      | 2                          |
| “Williams Syndrome and IQ”               | 121                           | 111                            | 26                                    | 37                     | 15             | -                 | 4                       | 7                      | 22                         |

|                                               |    |    |    |    |    |   |   |   |    |
|-----------------------------------------------|----|----|----|----|----|---|---|---|----|
| “15q11.2 deletion and cognitive ability”      | 4  | 4  | 1  | -  | 1  | 1 | 1 | - | 0  |
| “15q11.2 deletion and IQ”                     | 6  | 6  | 3  | 1  | 2  | - | - | - | 0  |
| “Prader-Willi syndrome and cognitive ability” | 47 | 45 | 11 | 11 | 3  | 3 | 3 | 4 | 8  |
| “Prader-Willi syndrome and IQ”                | 87 | 76 | 11 | 27 | 13 | - | 3 | 8 | 15 |
| “Angelman syndrome and cognitive ability”     | 24 | 19 | 9  | 3  | -  | 6 | - | - | 1  |
| “Angelman syndrome and IQ”                    | 10 | 3  | 1  | -  | -  | - | 2 | - | 1  |
| “16p11.2 deletion and cognitive ability”      | 12 | 11 | -  | -  | 8  | 1 | - | - | 2  |
| “16p11.2 deletion and IQ”                     | 14 | 12 | 3  | 2  | 4  | - | - | - | 3  |
| “16p11.2 duplication and cognitive ability”   | 7  | 0  | -  | -  | -  | - | - | - | 0  |
| “16p11.2 duplication and IQ”                  | 8  | 0  | -  | -  | -  | - | - | - | 0  |
| “17p11.2 deletion and                         | 1  | 1  | 1  | -  | -  | - | - | - | 0  |

|                                                     |     |    |   |   |    |   |   |   |    |
|-----------------------------------------------------|-----|----|---|---|----|---|---|---|----|
| cognitive ability”                                  |     |    |   |   |    |   |   |   |    |
| “17p11.2 deletion and IQ”                           | 1   | 1  | - | - | -  | - | - | - | 1  |
| “Smith-Magenis Syndrome and Cognitive ability”      | 5   | 2  | - | 1 | -  | - | - | - | 1  |
| “Smith-Magenis Syndrome and IQ”                     | 6   | 6  | 1 | 4 | -  | - | - | - | 1  |
| “22q11.2 deletion and cognitive ability”            | 54  | 52 | 9 | 9 | 14 | 1 | 1 | 1 | 17 |
| “22q11.2 deletion and IQ”                           | 102 | 85 | 6 | 8 | 33 | - | 5 | 2 | 31 |
| “Velocardial facial syndrome and cognitive ability” | 46  | 12 | 1 | 7 | 2  | - | - | 1 | 1  |
| “Velocardial facial syndrome and IQ”                | 88  | 25 | 3 | 2 | 5  | - | 2 | 1 | 12 |

**Table S2. Search and exclusion criteria for cognitive ability literature search.** Only unique papers were counted.

\*Studies that were returned in previous search results are not counted
